# Supplementary material for: Nradd Acts as a Negative Feedback Regulator of Wnt/β-Catenin Signaling and Promotes Apoptosis
Source: MDPI journal article supplement (doi:10.3390/biom11010100), 2021-01-14
Supplement: s1 [file s1]

**Supplementary Figure for Ozalp et. al.**

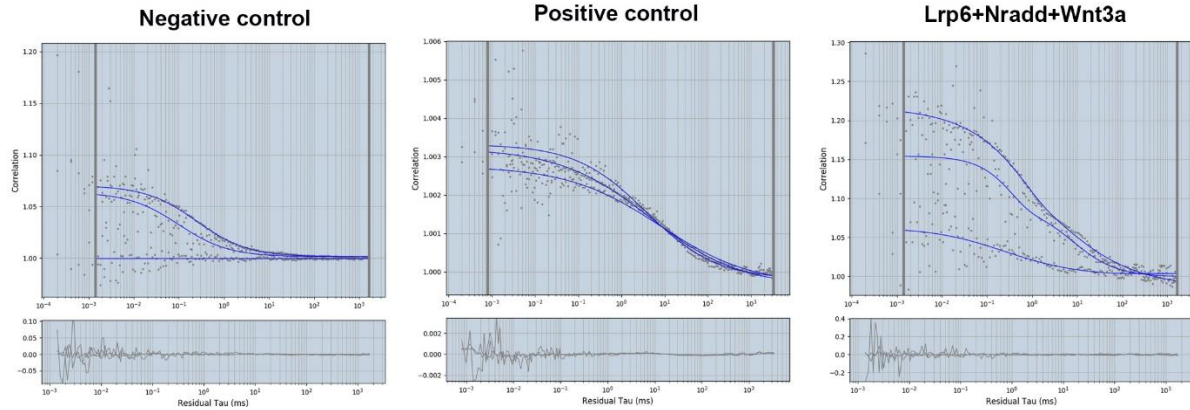

**Figure S1 Autocorrelation and cross-correlation analysis of EGFP and mCherry/mRuby3 tagged proteins in live U2OS cells.** Representative graphics show low cross-correlation (negative control) and high cross-correlation (positive control and Lrp6+Nradd+Wnt3a). Autocorrelation function (FCS) for GFP (top curve) and mCherry/mRuby3 (middle curve). Cross-correlation function (FCCS, bottom curve) for Nradd-GFP and Lrp-mCherry in the plasma membrane. x axis and y axis show lag time (ms) and correlation  $G(\tau)I$ , respectively.
